# Supplementary material for: Transcriptome analysis during somatic embryogenesis of the tropical monocot Elaeis guineensis: evidence for conserved gene functions in early development
Source: Springer Nature journal article supplement (doi:10.1007/s11103-009-9464-3), 2009-02-07
Supplement: MOESM4 [file 11103_2009_9464_MOESM4_ESM.xls]

## Sheet: Rep2- Profile 3 T1&T8
Arrayvision Name	Function	Blast	Ratio N/M	F	Proba	T0	T1*	T2	T4	T8*	T16	SE
EG-S41_006_H01	Cell Growth/Division	formin 2 [Homo sapiens] emb|CAI17009.1| formin 2 [Homo sapie	19.7082	194.028	0.000154044	1.558	3.10733	1.84667	0.465	0.157667	0.244667	0.292333
EG-S41_010_B01	Cell Growth/Division	single-stranded DNA-binding replication protein A [Hyacinthu	2.74386	78.8186	0.000889251	1.593	2.75667	2.45367	0.824667	1.00467	0.908667	0.695667
EG-S31_002_E07_A	Disease/Defense	glutathione S-transferase 2 [Papaver somniferum] gb|AAF22517	27.5035	437.937	3.08138e-05	0.241667	5.20733	3.86733	5.515	0.189333	1.04667	0.195333
EG-S31_003_H04_A	Disease/Defense	glutathione S-transferase 2 [Papaver somniferum] gb|AAF22517	41.3058	351.809	4.75721e-05	0.726333	7.83433	6.536	7.94633	0.189667	1.40633	0.424667
EG-S31_009_B04	Disease/Defense	PR-4b protein [Nicotiana tabacum] sp|P29063|PR4B_TOBAC Patho	10.6274	212.082	0.000129305	31.6943	7.97767	9.65733	16.3617	0.750667	4.43367	0.823333
EG-S41_007_F04	Disease/Defense	glutathione S-transferase 2 [Papaver somniferum] gb|AAF22517	11.1564	347.845	4.86522e-05	0.291	2.78167	2.036	1.99267	0.249333	0.692667	0.404333
EG-S31_003_G06_A	Metabolism	uroporphyrinogen decarboxylase	6.15803	48.0525	0.00227377	0.282667	1.62367	1.54367	1.082	0.263667	0.291	0.149667
EG-S31_004_G01	No Significant Homology to Public Databases	Pas de Hit	1.85714	78.935	0.000886737	0.512	1.21333	0.813333	0.555	0.653333	0.0716667	0.472333
EG-S31_006_B05_A	No Significant Homology to Public Databases	Pas de Hit	30.4309	434.503	3.12991e-05	0.333667	3.15467	2.828	0.886	0.103667	0.999667	0.768667
EG-S31_007_D10_A	No Significant Homology to Public Databases	Pas de Hit	1.63066	1.49737	0.288228	1.395	1.56	1.19867	1.12933	0.956667	1.641	1.28233
EG-S31_007_G03_A	No Significant Homology to Public Databases	Pas de Hit	40.0768	62.391	0.00138954	0.225333	12.3437	11.41	6.796	0.308	1.012	0.242667
EG-S31_010_C11	No Significant Homology to Public Databases	Pas de Hit	5.75312	47.3447	0.00233777	0.686667	1.38267	1.65733	1.359	0.240333	0.906	0.24
EG-S41_001_C07	No Significant Homology to Public Databases	Pas de Hit	5.62023	350.437	4.79417e-05	1.34867	1.96333	1.38	0.324333	0.349333	0.459667	0.318333
EG-S41_002_A11	No Significant Homology to Public Databases	Pas de Hit	7.49536	553.338	1.93623e-05	1.02633	2.15367	1.66	0.255	0.287333	0.372	0.108
EG-S41_002_C01	No Significant Homology to Public Databases	Pas de Hit	5.69025	138.427	0.00029859	2.23833	2.19833	2.04033	1.22433	0.386333	0.987333	0.415
EG-S41_002_D05	No Significant Homology to Public Databases	Pas de Hit	17.9976	241.016	0.000100494	4.947	7.571	6.03	1.414	0.420667	0.667667	0.259667
EG-S41_002_E12	No Significant Homology to Public Databases	Pas de Hit	118.737	229.718	0.000110475	0.917	1.504	1.94033	1.36067	0.0126667	0.677333	0.366
EG-S41_002_F07	No Significant Homology to Public Databases	Pas de Hit	29.25	262.331	8.5015e-05	1.174	1.638	1.388	0.828	0.056	0.278333	0.168
EG-S41_002_G03	No Significant Homology to Public Databases	Pas de Hit	4.18591	149.892	0.000255578	1.01333	1.92133	1.392	0.511	0.459	0.178667	0.312333
EG-S41_003_B04	No Significant Homology to Public Databases	Pas de Hit	6.04197	435.922	3.10971e-05	0.887	1.39167	1.38233	0.359	0.230333	0.278333	0.142
EG-S41_003_C05	No Significant Homology to Public Databases	Pas de Hit	4.83502	113.717	0.000437989	1.88733	2.071	2.52033	1.19867	0.428333	0.361	0.336
EG-S41_003_D07	No Significant Homology to Public Databases	Pas de Hit	3.45775	68.3586	0.00116776	1.00667	1.14567	1.051	1.35867	0.331333	1.42333	0.614
EG-S41_003_F03	No Significant Homology to Public Databases	Pas de Hit	4.35381	71.3704	0.00107547	0.789667	1.087	0.817333	0.333	0.249667	0.220333	0.398
EG-S41_004_A12	No Significant Homology to Public Databases	Pas de Hit	4.78936	598.596	1.65601e-05	1.06067	2.19033	1.99	0.466	0.457333	0.427667	0.314
EG-S41_004_D03	No Significant Homology to Public Databases	Pas de Hit	22.9515	66.973	0.00121426	1.09333	1.73667	1.34733	0.240333	0.0756667	1.34733	0.238667
EG-S41_004_G10	No Significant Homology to Public Databases	Pas de Hit	3.77195	19.1983	0.0118602	0.742667	1.17433	1.334	0.529667	0.311333	0.211333	0.262667
EG-S41_005_D06	No Significant Homology to Public Databases	Pas de Hit	13.9722	140.819	0.000288764	0.819667	1.34133	0.885333	0.212667	0.096	0.272	0.310333
EG-S41_005_G06	No Significant Homology to Public Databases	Pas de Hit	3.97743	40.6488	0.00310445	1.30833	2.23267	1.149	0.436333	0.561333	0.499	0.591667
EG-S41_005_H05	No Significant Homology to Public Databases	Pas de Hit	1.89498	8.43187	0.0439516	1.09933	0.818	0.924	0.82	0.431667	0.972	0.617333
EG-S41_006_A05	No Significant Homology to Public Databases	Pas de Hit	19.9775	31.222	0.00503215	1.75633	2.96333	1.983	0.278	0.148333	0.243	0.185
EG-S41_006_E01	No Significant Homology to Public Databases	Pas de Hit	14.7787	100.026	0.000561718	1.769	3.38433	1.83233	0.462	0.229	0.361333	0.327333
EG-S41_006_G07	No Significant Homology to Public Databases	Pas de Hit	7.82189	1012.6	5.81332e-06	1.70067	2.62033	2.16133	0.589667	0.335	0.486	0.467333
EG-S41_007_D02	No Significant Homology to Public Databases	Pas de Hit	7.46128	205.894	0.000137066	3.419	5.81233	6.08767	1.358	0.779	1.38967	0.893667
EG-S41_007_E09	No Significant Homology to Public Databases	Pas de Hit	3.63759	29.0458	0.00573249	1.446	1.79333	1.677	0.543333	0.493	0.178667	0.355
EG-S41_007_F07	No Significant Homology to Public Databases	Pas de Hit	3.65746	215.855	0.000124891	1.863	3.26733	3.34167	0.664	0.893333	0.648667	0.414667
EG-S41_008_C05	No Significant Homology to Public Databases	Pas de Hit	13.7574	144.714	0.000273768	2.035	3.89333	3.13533	0.609333	0.283	0.387333	0.790333
EG-S41_009_E10	No Significant Homology to Public Databases	Pas de Hit	17.2338	120.696	0.000390074	1.074	2.30933	1.47133	0.334	0.134	0.129	0.139667
EG-S41_009_F05	No Significant Homology to Public Databases	Pas de Hit	7.74	166.62	0.000207738	0.911	1.548	1.205	0.257667	0.2	0.317667	0.316333
EG-S41_009_G02	No Significant Homology to Public Databases	Pas de Hit	14.6375	663.78	1.3482e-05	4.31433	7.026	5.436	0.902667	0.48	0.538667	0.408333
EG-S41_009_G07	No Significant Homology to Public Databases	Pas de Hit	1.34069	30.4509	0.00526485	1.17167	1.317	0.757667	0.555	0.982333	0.446	0.747667
EG-S41_009_H12	No Significant Homology to Public Databases	Pas de Hit	92.86	1092.64	4.99517e-06	0.574667	1.54767	1.358	0.803667	0.0166667	0.720667	0.406
EG-S41_010_A01	No Significant Homology to Public Databases	Pas de Hit	2.28178	229.663	0.000110526	1.09433	1.21467	0.741333	0.358	0.532333	1.07933	0.564333
EG-S41_010_B08	No Significant Homology to Public Databases	Pas de Hit	26.2672	259.617	8.6779e-05	1.95433	3.30967	2.294	0.417	0.126	0.241667	0.0563333
EG-S41_010_C03	No Significant Homology to Public Databases	Pas de Hit	2.20746	238.542	0.00010256	1.11367	1.479	0.925667	0.412333	0.67	0.432	0.589667
EG-S41_010_E04	No Significant Homology to Public Databases	Pas de Hit	4.4266	103.499	0.000525788	2.054	2.88467	2.17167	0.587	0.651667	0.497	0.505667
EG-S31_010_A07	Protein Destination and Storage	molecular chaperone Hsp90-1 [Lycopersicon esculentum]	137.288	296.758	6.66273e-05	1.58333	10.6627	8.40267	2.14967	0.0776667	1.10433	0.225
EG-S41_004_F07	Protein Destination and Storage	putative thimet oligopeptidase [Oryza sativa (japonica culti	7.04058	25.2825	0.00734294	1.55267	1.61933	1.82267	1.29533	0.23	0.262333	0.106333
EG-S41_003_G10	Protein Synthesis	eukaryotic translation initiation factor 5A isoform VIII [He	4.58109	68.6889	0.00115707	0.718333	1.53467	2.52833	1.71833	0.335	0.577667	0.240333
EG-S41_008_D02	Protein Synthesis	eukaryotic translation initiation factor 5A isoform VIII [He	5.51477	77.6396	0.000915342	0.662333	1.307	1.06667	0.516333	0.237	0.504667	0.651333
EG-S41_001_E06	Secondary Metabolism	putative spermine synthase [Taxodium distichum]	7.33625	468.96	2.68987e-05	1.897	1.95633	2.291	1.72667	0.266667	0.902	1.636
EG-S31_003_A11_A	Transcription and Post-transcription	Dcp1-like decapping family, putative [Oryza sativa (japonica	69.3552	69.3459	0.00113624	0.147	4.23067	3.849	4.811	0.061	1.26633	0.204
EG-S41_003_E04	Transcription and Post-transcription	shootmeristemless-like [Petunia x hybrida]	3.03659	255.988	8.9225e-05	1.30133	1.245	1.13667	0.876667	0.41	0.531	0.500333
EG-S41_005_A12	Transcription and Post-transcription	putative gigantea [Oryza sativa (japonica cultivar-group)] d	4.36074	275.051	7.74229e-05	0.676	1.41433	1.11667	0.629	0.324333	0.467	0.314667
EG-S41_005_F05	Transposons	retrotransposon protein [O. sativa (japonica cultivar-group)]	22.135	502.066	2.34901e-05	1.43833	1.47567	1.52133	1.054	0.0666667	0.454333	0.234
EG-S41_003_C06	Unknown or Unclassified Proteins	unknown [Schistosoma japonicum]	3.82542	204.649	0.000138713	1.99867	3.14067	3.22233	1.301	0.821	1.02933	2.82467
EG-S41_005_F01	Unknown or Unclassified Proteins	putative GAMM1 protein [Oryza sativa (japonica cultivar-grou	5.37275	533.986	2.07821e-05	1.25533	1.39333	1.076	0.955333	0.259333	0.429333	0.275667
EG-S41_006_A07	Unknown or Unclassified Proteins	unknown [Schistosoma japonicum]	13.88	237.344	0.000103584	1.91	2.89167	2.33467	0.505667	0.208333	0.264333	0.231333
total significant 57
9 insignificant in at least one ANOVA
EG-S41_004_G03	Unknown or Unclassified Proteins	unknown protein [Oryza sativa (japonica cultivar-group)]	49.5079	186.938	0.000165739	1.80833	2.07933	2.07533	1.34367	0.042	0.413667	0.141667
EG-S31_007_H10_A	Unknown or Unclassified Proteins	OSJNBa0006A01.14 [Oryza sativa (japonica cultivar-group)] em	3.21256	204.103	0.000139443	1.10667	1.55167	1.11167	1.68	0.483	1.56067	0.493333
EG-S41_001_H09	Transposons	copia-type polyprotein, putative [Arabidopsis thaliana] gb|A	2.43333e+10	3.97984	0.116788	1.26033	1.33033	1.44367	2.153	0.319	0.958667	1.94533
EG-S41_004_A07	Transporters	putative multidrug resistance-associated protein 7 [Oryza sa	32.8466	748.381	1.06181e-05	1.77333	2.06933	2.19	1.412	0.063	0.440667	0.266
EG-S41_004_D05	Signal Transduction	ethylene receptor [Gladiolus hybrid cultivar 'Traveler']	8.56881	459.952	2.79549e-05	2.216	2.17933	1.77533	1.45633	0.254333	0.442333	0.206667
EG-S41_004_F08	Protein Synthesis	MAR-binding protein [Nicotiana tabacum]	14.0898	225.509	0.000114576	2.16567	2.30133	1.82167	1.366	0.163333	0.436	0.228
EG-S31_008_D09_A	No Significant Homology to Public Databases	Pas de Hit	6.23937	44.3607	0.00263968	5.258	1.32067	0.939	0.839	0.211667	0.599	0.203
EG-S31_010_F12	Disease/Defense	acidic PR-1 type pathogenesis-related protein PR-1a [Oryza s	5.82389	113.304	0.000441092	3.65033	0.959	0.533	0.432	0.164667	0.0713333	0.069
EG-S41_005_B03	No Significant Homology to Public Databases	Pas de Hit	8.55063	502.751	2.34265e-05	3.023	3.406	3.135	1.93	0.398333	1.22833	0.608333

## Sheet: Rep 1 - Profile 3 T1-T8
Arrayvision Name	Function	Blast	Ratio N/M	F	Proba	T0	T1	T2	T4	T8	T16	SE
EG-S41_006_H01	Cell Growth/Division	formin 2 [Homo sapiens] emb|CAI17009.1| formin 2 [Homo sapie	48.8734	309.734	6.12185e-05	1.299	1.287	1.169	0.659333	0.0263333	1.31367	0.744333
EG-S41_010_B01	Cell Growth/Division	single-stranded DNA-binding replication protein A [Hyacinthu	1.62351	56.3042	0.0016878	1.80633	1.86	1.85033	1.04567	1.14567	1.80367	1.51233
EG-S31_002_E07_A	Disease/Defense	glutathione S-transferase 2 [Papaver somniferum] gb|AAF22517	7.24765	134.884	0.000314096	1.755	2.05833	2.311	2.71433	0.284	1.17	0.517
EG-S31_003_H04_A	Disease/Defense	glutathione S-transferase 2 [Papaver somniferum] gb|AAF22517	6.80822	524.472	2.15381e-05	1.61867	4.63867	5.13733	5.70733	0.681333	2.54567	1.43567
EG-S31_009_B04	Disease/Defense	PR-4b protein [Nicotiana tabacum] sp|P29063|PR4B_TOBAC Patho	1.84753	14.1731	0.0196942	17.9593	2.985	5.26333	10.1747	1.61567	3.531	1.72933
EG-S31_010_F12	Disease/Defense	acidic PR-1 type pathogenesis-related protein PR-1a [Oryza s	0.968889	0.124401	0.742111	1.039	0.654	0.684	1.424	0.675	2.55133	0.166333
EG-S41_007_F04	Disease/Defense	glutathione S-transferase 2 [Papaver somniferum] gb|AAF22517	2.98577	2694.48	8.24382e-07	1.28533	1.679	1.78633	1.794	0.562333	1.33933	0.827333
EG-S31_003_G06_A	Metabolism	AT3g14930/K15M2_7 [Arabidopsis thaliana]	4.45869	220.8	0.000119441	0.957667	1.403	1.39067	1.113	0.314667	1.24	0.774333
EG-S31_004_G01	No Significant Homology to Public Databases	Pas de Hit	1.56085	49.7773	0.00212839	1.66667	1.93233	2.48033	1.43567	1.238	1.81267	1.847
EG-S31_006_B05_A	No Significant Homology to Public Databases	Pas de Hit	12.9908	1072.54	5.18358e-06	1.65	1.87933	1.544	1.01133	0.144667	2.042	1.02
EG-S31_007_D10_A	No Significant Homology to Public Databases	Pas de Hit	7.31172	165.76	0.000209857	1.43767	2.14233	1.76633	1.51467	0.293	1.74633	2.24667
EG-S31_007_G03_A	No Significant Homology to Public Databases	Pas de Hit	6.21595	30.1403	0.00536316	1.126	5.066	6.453	2.752	0.815	1.47733	0.765667
EG-S31_008_D09_A	No Significant Homology to Public Databases	Pas de Hit	1.29766	6.62226	0.061758	0.890667	0.703333	0.955	1.82067	0.542	3.11833	0.178667
EG-S31_010_C11	No Significant Homology to Public Databases	Pas de Hit	1.77924	9.18418	0.0387599	1.53933	1.44	0.713333	0.858	0.809333	0.941333	1.022
EG-S41_001_C07	No Significant Homology to Public Databases	Pas de Hit	3.9457	384.14	3.99644e-05	2.12567	1.57433	1.314	1.15733	0.399	1.26533	1.30133
EG-S41_002_A11	No Significant Homology to Public Databases	Pas de Hit	14.0582	124.499	0.000367207	0.972333	1.28867	0.934333	0.642667	0.0916667	1.02267	0.557
EG-S41_002_C01	No Significant Homology to Public Databases	Pas de Hit	0.394887	99.1195	0.000571706	0.388	0.782667	1.512	1.53167	1.982	1.7	0.170667
EG-S41_002_D05	No Significant Homology to Public Databases	Pas de Hit	0.650895	12.5448	0.0239733	1.14267	0.811667	1.14767	1.51367	1.247	2.07833	0.308
EG-S41_002_E12	No Significant Homology to Public Databases	Pas de Hit	0.691894	11.105	0.02904	0.114333	0.600333	0.795667	1.48433	0.867667	1.307	0.132333
EG-S41_002_F07	No Significant Homology to Public Databases	Pas de Hit	1.27535	41.3196	0.0030118	1.99667	1.29533	1.291	1.68233	1.01567	1.763	1.07633
EG-S41_002_G03	No Significant Homology to Public Databases	Pas de Hit	3.44513	215.737	0.000125026	1.585	1.873	1.84767	1.21133	0.543667	1.60433	1.348
EG-S41_003_B04	No Significant Homology to Public Databases	Pas de Hit	2.47608	61.2945	0.00143711	1.04633	0.742	0.851333	0.680333	0.299667	0.932667	0.596667
EG-S41_003_C05	No Significant Homology to Public Databases	Pas de Hit	0.742361	13.3016	0.0218266	0.773333	0.955667	2.00433	2.37933	1.28733	1.50267	0.345
EG-S41_003_D07	No Significant Homology to Public Databases	Pas de Hit	3.625	575.228	1.79248e-05	1.694	1.31467	1.474	1.82867	0.362667	1.41967	0.967333
EG-S41_003_F03	No Significant Homology to Public Databases	Pas de Hit	6.19052	295.208	6.73212e-05	2.30133	2.22033	2.36233	1.42167	0.358667	1.735	1.97067
EG-S41_004_A12	No Significant Homology to Public Databases	Pas de Hit	21.6523	343.987	4.9739e-05	2.82533	1.84767	1.919	1.24667	0.0853333	1.40467	1.914
EG-S41_004_D03	No Significant Homology to Public Databases	Pas de Hit	18.6309	702.421	1.20461e-05	2.04267	1.447	1.37133	0.98	0.0776667	1.47967	1.20067
EG-S41_004_G10	No Significant Homology to Public Databases	Pas de Hit	3.6345	294.96	6.74329e-05	1.617	1.35567	0.826	3.61967	0.373	1.19333	0.919
EG-S41_005_B03	No Significant Homology to Public Databases	Pas de Hit	0.781662	2.4546	0.192246	0.332667	1.12533	1.64233	2.443	1.43967	2.38067	0.236667
EG-S41_005_D06	No Significant Homology to Public Databases	Pas de Hit	4.24682	105.337	0.000508145	2.14933	1.56	1.53633	1.024	0.367333	1.06767	1.39567
EG-S41_005_G06	No Significant Homology to Public Databases	Pas de Hit	3.11484	370.667	4.28955e-05	2.064	2.13367	2.65133	1.33733	0.685	2.06133	1.719
EG-S41_005_H05	No Significant Homology to Public Databases	Pas de Hit	2.41923	81.2212	0.000839422	2.57133	2.12167	2.23233	1.84467	0.877	2.398	1.624
EG-S41_006_A05	No Significant Homology to Public Databases	Pas de Hit	5.37432	368.811	4.33244e-05	1.28133	0.990667	0.924	0.470667	0.184333	0.973333	0.557667
EG-S41_006_E01	No Significant Homology to Public Databases	Pas de Hit	4.91978	90.8392	0.000676683	2.19567	1.49233	1.02333	0.758333	0.303333	1.46867	0.926667
EG-S41_006_G07	No Significant Homology to Public Databases	Pas de Hit	3.77709	1357.26	3.2411e-06	1.98333	1.83567	1.85133	1.08633	0.486	1.54533	1.93333
EG-S41_007_D02	No Significant Homology to Public Databases	Pas de Hit	2.30682	44.7655	0.0025954	2.07933	2.243	2.162	1.40133	0.972333	2.97	2.039
EG-S41_007_E09	No Significant Homology to Public Databases	Pas de Hit	2.76954	125.034	0.000364158	2.31667	1.63033	1.66867	1.19267	0.588667	1.361	1.73167
EG-S41_007_F07	No Significant Homology to Public Databases	Pas de Hit	2.18144	220.714	0.000119533	2.207	2.076	2.33233	1.55367	0.951667	2.034	1.932
EG-S41_008_C05	No Significant Homology to Public Databases	Pas de Hit	5.59048	368.833	4.33193e-05	2.39433	2.19333	1.93633	1.25333	0.392333	1.621	1.49033
EG-S41_009_E10	No Significant Homology to Public Databases	Pas de Hit	2.08323	74.5011	0.000990672	1.42667	1.17633	1.08667	0.619667	0.564667	1.23833	1.35867
EG-S41_009_F05	No Significant Homology to Public Databases	Pas de Hit	3.46341	83.519	0.000795584	1.58967	1.278	1.14267	0.685667	0.369	1.15467	1.121
EG-S41_009_G02	No Significant Homology to Public Databases	Pas de Hit	6.66364	137.785	0.000301315	2.039	1.71033	1.91267	1.09567	0.256667	1.99	1.95633
EG-S41_009_G07	No Significant Homology to Public Databases	Pas de Hit	2.28368	267.311	8.1915e-05	2.991	2.57067	2.296	1.43933	1.12567	1.996	2.208
EG-S41_009_H12	No Significant Homology to Public Databases	Pas de Hit	9.62811	96.5797	0.000601147	2.25967	1.80367	0.992667	1.07	0.187333	1.16967	0.605667
EG-S41_010_A01	No Significant Homology to Public Databases	Pas de Hit	2.3823	63.5905	0.00134016	2.22533	2.37833	2.733	1.233	0.998333	1.879	2.11033
EG-S41_010_B08	No Significant Homology to Public Databases	Pas de Hit	1.33433e+12	353.442	4.71375e-05	1.811	1.33433	0.741	0.671333	1e-12	1.547	0.741667
EG-S41_010_C03	No Significant Homology to Public Databases	Pas de Hit	3.81424	37.7088	0.00356564	2.449	2.464	2.486	1.24867	0.646	1.98967	1.89533
EG-S41_010_E04	No Significant Homology to Public Databases	Pas de Hit	4.64529	175.83	0.000186929	1.925	1.54533	1.739	1.06733	0.332667	1.702	1.54233
EG-S31_010_A07	Protein Destination and Storage	molecular chaperone Hsp90-1 [Lycopersicon esculentum]	2.9918	15.0441	0.0178614	0.385667	3.03867	0.994333	0.258333	1.01567	1.497	0.213667
EG-S41_004_F07	Protein Destination and Storage	putative thimet oligopeptidase [Oryza sativa (japonica culti	0.557567	45.0618	0.00256369	0.119333	0.626333	1.27433	1.44433	1.12333	1.52567	0.0703333
EG-S41_003_G10	Protein Synthesis	eukaryotic translation initiation factor 5A isoform VIII [He	2.96794	160.717	0.000222958	1.614	1.45033	1.71867	1.849	0.488667	1.66233	0.873333
EG-S41_004_F08	Protein Synthesis	MAR-binding protein [Nicotiana tabacum]	0.893985	0.645858	0.46664	0.331667	1.00067	1.983	2.48033	1.11933	1.83	0.27
EG-S41_008_D02	Protein Synthesis	eukaryotic translation initiation factor 5A isoform VIII [He	3.6097	103.06	0.000530139	1.395	1.66167	1.78567	1.17733	0.460333	1.43233	1.57
EG-S41_001_E06	Secondary Metabolism	putative spermine synthase [Taxodium distichum]	0.7151	11.8934	0.0260859	0.262667	0.877667	1.43233	2.28833	1.22733	1.69367	0.875333
EG-S41_004_D05	Signal Transduction	ethylene receptor [Gladiolus hybrid cultivar 'Traveler']	0.947282	0.443927	0.541694	0.298	1.156	2.15633	2.93433	1.22033	2.31967	0.104667
EG-S31_003_A11_A	Transcription and Post-transcription	Dcp1-like decapping family, putative [Oryza sativa (japonica	7.92255	88.4696	0.000712074	1.307	1.94367	2.159	2.21233	0.245333	1.066	0.379333
EG-S41_003_E04	Transcription and Post-transcription	shootmeristemless-like [Petunia x hybrida]	2.22195	247.84	9.51077e-05	2.53033	2.44933	3.18033	2.21133	1.10233	2.35233	1.67133
EG-S41_004_A07	Transporters	putative multidrug resistance-associated protein 7 [Oryza sa	1.18794	0.584043	0.487325	0.518	1.07667	1.501	2.25133	0.906333	1.90033	0.342
EG-S41_001_H09	Transposons	copia-type polyprotein, putative [Arabidopsis thaliana] gb|A	0.308	3.98628	0.116573	1.38933	1.456	1.43633	1.99267	0.765333	1.44167	2.08633
EG-S41_005_F05	Transposons	OSJNBa0080E14.9 [Oryza sativa (japonica cultivar-group)] emb	0.637484	12.038	0.0255935	0.755667	0.810667	1.26	2.091	1.27167	1.44667	0.348667
EG-S31_007_H10_A	Unknown or Unclassified Proteins	OSJNBa0006A01.14 [Oryza sativa (japonica cultivar-group)] em	1.47726	5.04266	0.0880748	2.011	1.53733	1.669	1.968	1.04067	1.73067	1.63567
EG-S41_003_C06	Unknown or Unclassified Proteins	unknown [Schistosoma japonicum]	2.02404	100.886	0.000552483	2.80367	2.526	2.44033	1.978	1.248	2.49667	2.31767
EG-S41_004_G03	Unknown or Unclassified Proteins	unknown protein [Oryza sativa (japonica cultivar-group)]	0.808088	2.67286	0.177412	0.610333	1.20567	2.24467	2.36867	1.492	1.43667	0.074
EG-S41_005_A12	Unknown or Unclassified Proteins	putative gigantea [Oryza sativa (japonica cultivar-group)] d	4.84522	130.205	0.000336494	1.53567	1.2	0.919333	0.797667	0.247667	0.840333	0.971
EG-S41_005_F01	Unknown or Unclassified Proteins	putative GAMM1 protein [Oryza sativa (japonica cultivar-grou	0.48131	135.609	0.000310828	0.304667	0.519333	1.01967	1.40267	1.079	1.20167	0.172
EG-S41_006_A07	Unknown or Unclassified Proteins	unknown [Schistosoma japonicum]	4.73388	106.673	0.000495879	2.22067	1.73733	1.85067	0.886667	0.367	1.44333	1.371
